# Supplementary material
Source: HighWire-hosted journal article supplement (http://www.ajnr.org/highwire/filestream/59798/field_highwire_adjunct_files/0/17-00991.pdf)
Supplement: 17-00991.pdf [file 17-00991.pdf]

**On-line Table 1: Summary of associated CNS abnormalities**

|                                                | Aqueductal Stenosis Group (No.) | Ventriculomegaly Control Group (No.) |
|------------------------------------------------|---------------------------------|--------------------------------------|
| Chiari II malformation ( <i>n</i> = 14)        | 3                               | 11                                   |
| Dandy-Walker malformation ( <i>n</i> = 2)      | 1                               | 1                                    |
| Rhombencephalosynapsis ( <i>n</i> = 5)         | 5                               | 0                                    |
| Dystroglycanopathy ( <i>n</i> = 7)             | 7                               | 0                                    |
| Diencephalosynapsis ( <i>n</i> = 3)            | 2                               | 1                                    |
| Complete callosal agenesis ( <i>n</i> = 7)     | 1                               | 7                                    |
| Lissencephaly type 1 ( <i>n</i> = 2)           | 0                               | 2                                    |
| Polymicrogyria ( <i>n</i> = 2)                 | 2                               | 0                                    |
| Gray matter heterotopia ( <i>n</i> = 6)        | 6                               | 0                                    |
| Ischemia ( <i>n</i> = 1)                       | 0                               | 1                                    |
| Intracranial hemorrhage ( <i>n</i> = 17)       | 15                              | 2                                    |
| Septo-optic dysplasia ( <i>n</i> = 3)          | 1                               | 2                                    |
| Isolated mild ventriculomegaly ( <i>n</i> = 2) | 0                               | 4                                    |
| Cephalocele ( <i>n</i> = 2)                    | 2                               | 0                                    |
| Craniosynostosis ( <i>n</i> = 1)               | 0                               | 1                                    |

**On-Line Table 2: Univariate analysis of continuous variables**

| Variable                                      | Aqueductal Stenosis (Mean) |             | P Value |
|-----------------------------------------------|----------------------------|-------------|---------|
|                                               | No                         | Yes         |         |
| Lateral ventricle atrial diameter 1 (larger)  | 16.9 ± 7.03                | 25.8 ± 8.56 | <.0023  |
| Lateral ventricle atrial diameter 2 (smaller) | 13 ± 5.64                  | 19.6 ± 5.54 | <.0023  |
| Third ventricle diameter                      | 3.78 ± 1.89                | 7.37 ± 3.61 | <.0023  |
